# Supplementary material
Source: PubMed Central journal article supplement (PMC9940733)
Supplement: NIHMS1840162-supplement-1.pdf [file NIHMS1840162-supplement-1.pdf]

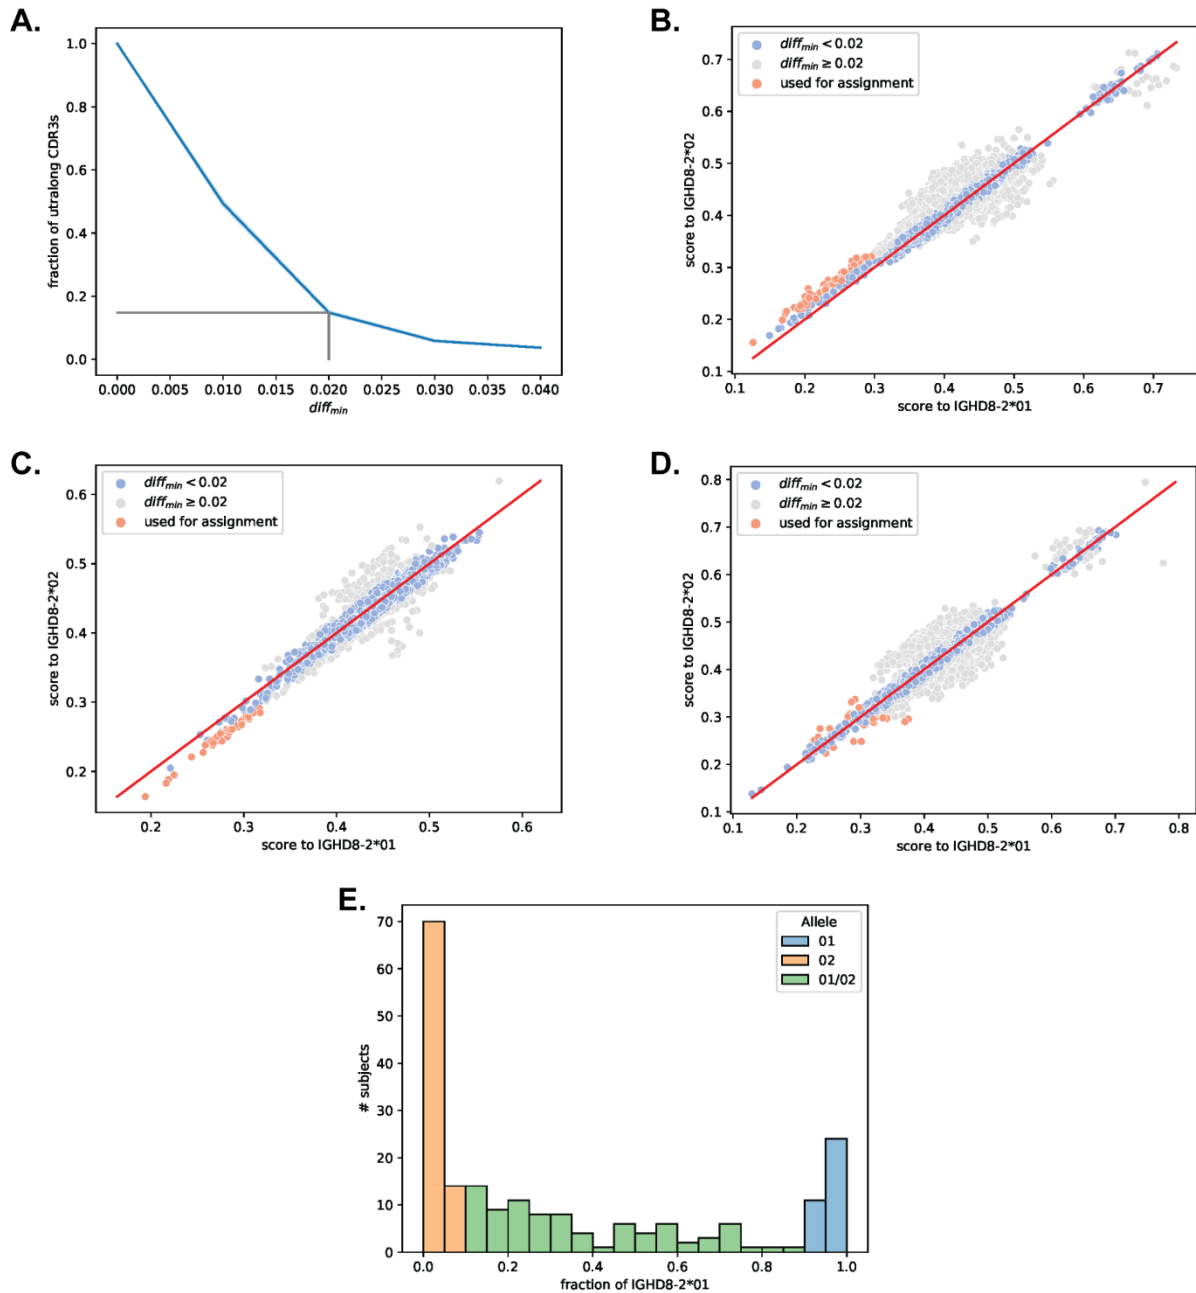

**Supplemental Figure 1. Assignment of IGHD8-2 alleles.** **A.** Fractions of ultralong CDRH3s with  $diff$  exceeding  $diff_{min}$  (x-axis) collected across 204 subjects. The selected value of  $diff_{min} = 0.02$  and the fraction of used CDRH3s corresponding to it shown by grey lines. **B.** Animal 14053 classified as homozygous for allele IGHD8-2\*01. Ultralong CDRH3s are shown as dots. The x-axis (y-axis) shows scores of alignments between ultralong CDRH3s and allele IGHD8-2\*01 (IGHD8-2\*02). The red line corresponds to  $x=y$ . CDRH3s were classified into three groups: (i) with  $diff_{min} < 0.02$ , (ii) with  $diff_{min} \geq 0.02$ , and (iii)  $diff_{min} \geq 0.02$  and the mutation rate below 0.3 and colored them in blue, grey, and red, respectively. CDR3s from the third group were used for allele assignment. **C.** Animal 14015 classified as homozygous by allele IGHD8-2\*02, with the legend as described in (B.). **D.** Animal 14363 classified as heterozygous, with the legend as described in (B.). **E.** The distribution of the fractions of non-discarded ultralong CDRH3s assigned to IGHD8-2\*01 across 204 subjects. Subjects classified as homozygous for allele IGHD8-2\*01, homozygous for allele IGHD8-2\*02, or heterozygous were shown in blue, orange, or green, respectively.
